## Retraction

# Retraction: $\alpha$ -bisabolol enhances radiotherapy-induced apoptosis in endometrial cancer cells by reducing the effect of XIAP on inhibiting caspase-3

Dongmei Fang, Hongxin Wang, Min Li and Wenwen Wei

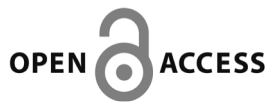

This Retraction follows an Expression of Concern relating to this article previously published by Portland Press. This article is being retracted from *Bioscience Reports* at the request of the authors following receipt of a notification from a reader alerting the Editorial Office to western blot bands that appear in both this paper and another paper by different authors (doi: 10.1186/s12935-019-0985-9). The authors wish to retract the article. The Editor-in-Chief and Editorial Board agree with the retraction.

Version of Record published:  
31 August 2022
